# Supplementary material for: Heavy Metals Assimilation by Native and Non-Native Aquatic Macrophyte Species: A Case Study of a River in the Eastern Cape Province of South Africa
Source: MDPI journal article supplement (doi:10.3390/plants10122676), 2021-12-06
Supplement: s1 [file s1]

## Supplementary Materials

**Table S1.** A summary of bio-physical characteristics of the ten sampling sites at the Swartkops River system, Eastern Cape, South Africa.

| Study sites | Riparian vegetation                                                                              | Stream vegetation                                                  | Site structure and characteristics                                                                                                                               |
|-------------|--------------------------------------------------------------------------------------------------|--------------------------------------------------------------------|------------------------------------------------------------------------------------------------------------------------------------------------------------------|
| 1           | Grasses and a few shrubs                                                                         | <i>Cyperus</i> spp., <i>Phragmites</i> spp., and <i>Typha</i> spp. | Open canopy, shallow, narrow channel composed of cobbles and a few pebble stones, with a medium flow and high water clarity                                      |
| 2           | <i>Typha</i> spp., and dense <i>Phragmites</i> spp.                                              | <i>Nasturtium officinale</i> , and <i>Stuckenia pectinata</i>      | Open canopy, composed of pebbles and boulders with medium turbidity.                                                                                             |
| 3           | <i>Typha</i> spp., and dense <i>Phragmites</i> spp.                                              | Permanent <i>P. crassipess</i> dense mat and <i>S. pectinata</i>   | Open canopy, composed of pebbles and boulders with medium turbidity                                                                                              |
| 4           | <i>Typha</i> spp., and dense <i>Phragmites</i> spp.,                                             | <i>N. officinale</i> and <i>S. pectinata</i>                       | Open canopy, composed of pebbles, boulders and deep waters                                                                                                       |
| 5           | Dense <i>Phragmites</i> spp., <i>Cyperus</i> spp., <i>Typha</i> spp., and <i>Eucalyptus</i> spp. | <i>N. officinale</i> and <i>S. pectinata</i>                       | Wider river channel, shallow water depth, open canopy. Composed of cobbles and boulders. Turbid and occasionally higher water velocity caused by sewage effluent |
| 6           | <i>Phragmites</i> spp., <i>Cyperus</i> spp., <i>Typha</i> spp., and <i>Eucalyptus</i> spp.       | Permanent <i>P. crassipess</i> dense mat                           | Open canopy, fully dense <i>P. crassipes</i> cover on the water column                                                                                           |
| 7           | <i>Phragmites</i> spp., <i>Cyperus</i> spp., <i>Typha</i> spp., and <i>Eucalyptus</i> spp.       | <i>N. officinale</i> and <i>S. pectinata</i>                       | Wider river channel, shallow water depth, open canopy. Composed of cobbles and boulders                                                                          |
| 8           | <i>Eucalyptus</i> spp., and <i>Typha</i> spp.                                                    | <i>N. officinale</i> and <i>S. pectinata</i>                       | Open canopy, composed of cobbles and pebbles, shallow to deep waters                                                                                             |



**Table S3.** Sediment chemistry mean and ( $\pm$  standard deviation) recorded from 10 sites, including native macrophytes stands along the Swartkops River system South Africa (April 2018–September 2018). Bolded *H*-values indicate significant differences (Kruskal–Wallis ANOVA,  $p < 0.05$ ).

| Heavy<br>metals<br>(mg/kg) | Sites                |                    |                     |                     |                       |                     |                     |                     |                     |                     | <i>H</i> -<br>Value |
|----------------------------|----------------------|--------------------|---------------------|---------------------|-----------------------|---------------------|---------------------|---------------------|---------------------|---------------------|---------------------|
|                            | 1                    | 2                  | 3                   | 4                   | 5                     | 6                   | 7                   | 8                   | 9                   | 10                  |                     |
| Fe                         | 1321.25 $\pm$ 838.89 | 967.37 $\pm$ 641.5 | 950.78 $\pm$ 283.05 | 520.02 $\pm$ 261.10 | 220.43 $\pm$ 136.60   | 554.19 $\pm$ 230.32 | 268.95 $\pm$ 206.10 | 769.73 $\pm$ 421.7  | 511.56 $\pm$ 210.11 | 628.36 $\pm$ 514.10 | <b>24.32</b>        |
| Zn                         | 7.59 $\pm$ 4.27      | 62.55 $\pm$ 31.04  | 41.92 $\pm$ 4.05    | 26.92 $\pm$ 15.30   | 87.16 $\pm$ 45.38     | 19.89 $\pm$ 12.44   | 9.65 $\pm$ 5.63     | 22.4 $\pm$ 15.97    | 11.17 $\pm$ 2.24    | 7.19 $\pm$ 1.92     | <b>35.79</b>        |
| Cd                         | 0.21 $\pm$ 0.21      | 0.12 $\pm$ 0.15    | 0.14 $\pm$ 0.16     | 0.17 $\pm$ 0.32     | 0.10 $\pm$ 0.11       | 0.02 $\pm$ 0.05     | 0.02 $\pm$ 0.03     | 0.02 $\pm$ 0.04     | 0.06 $\pm$ 0.10     | 0.06 $\pm$ 0.09     | 8.260               |
| As                         | 4 $\pm$ 2.67         | 0.61 $\pm$ 0.68    | 0.32 $\pm$ 0.42     | 1.20 $\pm$ 1.44     | 1.49 $\pm$ 0.83       | 1.46 $\pm$ 0.10     | 0.28 $\pm$ 0.42     | 1.55 $\pm$ 1.90     | 0.42 $\pm$ 0.42     | 0.27 $\pm$ 0.43     | <b>17.08</b>        |
| Cr                         | 11.54 $\pm$ 3.37     | 16.23 $\pm$ 6.98   | 18.03 $\pm$ 7.53    | 16.02 $\pm$ 10.28   | 41.12 $\pm$ 25.25     | 16.14 $\pm$ 7.34    | 9.50 $\pm$ 3.59     | 11.73 $\pm$ 5.21    | 9.08 $\pm$ 4.32     | 8.15 $\pm$ 2.86     | <b>20.39</b>        |
| Pb                         | 14.07 $\pm$ 6.73     | 16.36 $\pm$ 7.50   | 21.10 $\pm$ 7.39    | 10.23 $\pm$ 7.24    | 19.90 $\pm$ 8.54      | 6.43 $\pm$ 4.51     | 6.45 $\pm$ 5.57     | 8.42 $\pm$ 6.79     | 4.32 $\pm$ 5        | 3.67 $\pm$ 4.41     | <b>26.19</b>        |
| Hg                         | 2.07 $\pm$ 3.25      | 1.77 $\pm$ 2.50    | 1.26 $\pm$ 1.48     | 0.72 $\pm$ 0.88     | 1.36 $\pm$ 1.52       | 0.87 $\pm$ 1.45     | 0.64 $\pm$ 0.60     | 0.98 $\pm$ 1.19     | 0.99 $\pm$ 1.41     | 0.83 $\pm$ 1.11     | 1.756               |
| Cu                         | 1.58 $\pm$ 0.75      | 4.29 $\pm$ 0.67    | 2.73 $\pm$ 1.01     | 1.83 $\pm$ 1.49     | 5.56 $\pm$ 3.96       | 3.43 $\pm$ 2.47     | 0.67 $\pm$ 0.24     | 2.34 $\pm$ 0.86     | 1.32 $\pm$ 0.45     | 0.92 $\pm$ 0.14     | <b>26.46</b>        |
| P                          | 296.24 $\pm$ 128.88  | 978.45 $\pm$ 410.0 | 489.94 $\pm$ 275.31 | 391.60 $\pm$ 543.64 | 2240.83 $\pm$ 1899.70 | 454.77 $\pm$ 333.68 | 281.07 $\pm$ 215.38 | 1077.85 $\pm$ 274.5 | 863.70 $\pm$ 542.90 | 468.8 $\pm$ 344.05  | <b>21.63</b>        |

**Table S4.** Percentage reduction of heavy metals concentration in sediments semi and permanent stands of *Pontederia crassipes* and *Salvinia molesta* along the Swartkops River system, Eastern Cape, South Africa.

| Percentage reduction between immediate upstream and downstream sites per non-native macrophyte patch |                                                 |                                                 |                                               |
|------------------------------------------------------------------------------------------------------|-------------------------------------------------|-------------------------------------------------|-----------------------------------------------|
| Heavy metals in sediments                                                                            | Non-native macrophyte 1 ( <i>P. crassipes</i> ) | Non-native macrophyte 2 ( <i>P. crassipes</i> ) | Non-native macrophyte 3 ( <i>S. molesta</i> ) |
| Fe                                                                                                   | 46                                              | No reduction                                    | 18                                            |
| Zn                                                                                                   | 57                                              | 89                                              | 65                                            |
| As                                                                                                   | No reduction                                    | 81                                              | 83                                            |
| Cr                                                                                                   | 1                                               | 77                                              | 31                                            |
| Pb                                                                                                   | 37                                              | 68                                              | 56                                            |
| Hg                                                                                                   | 59                                              | 53                                              | 15                                            |
| Cu                                                                                                   | 57                                              | 88                                              | 60                                            |
| P                                                                                                    | 60                                              | 87                                              | 57                                            |
